# Supplementary material
Source: PubMed Central journal article supplement (PMC3470747)
Supplement: NIHMS378656-supplement-Supp_Fig_S1-S4.pdf [file NIHMS378656-supplement-Supp_Fig_S1-S4.pdf]

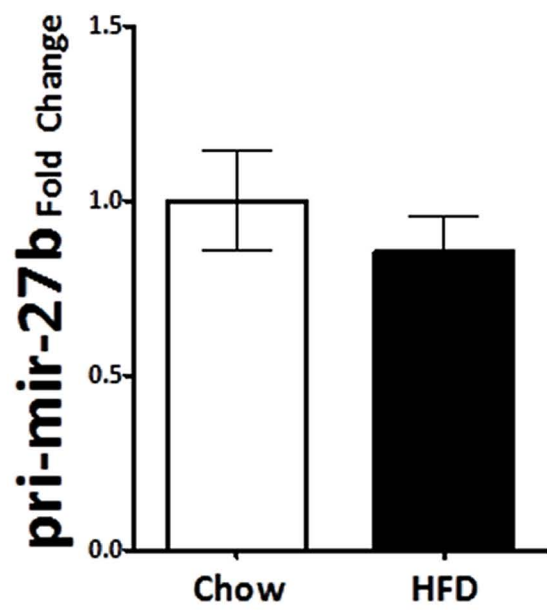

**Vickers Supplementary Figure 1**

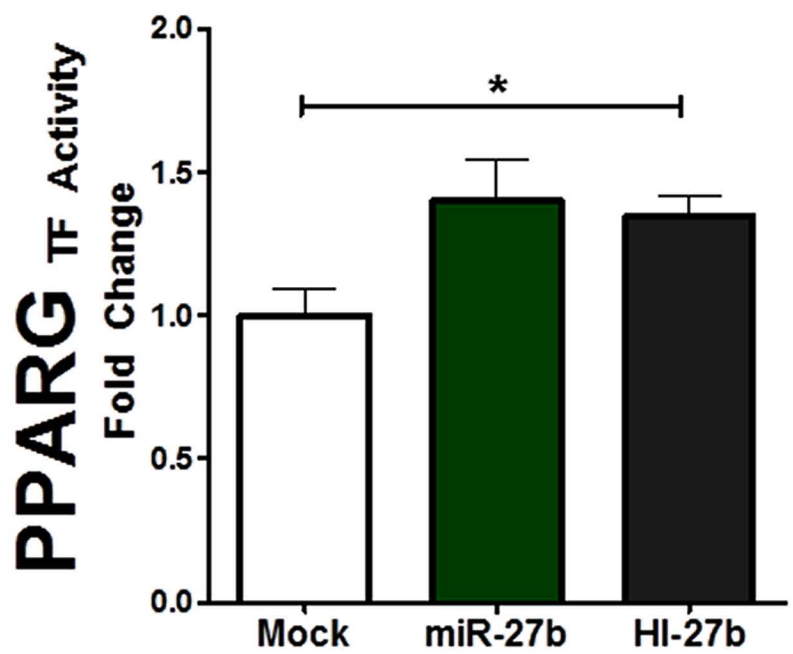

**Vickers Supplementary Figure 2**

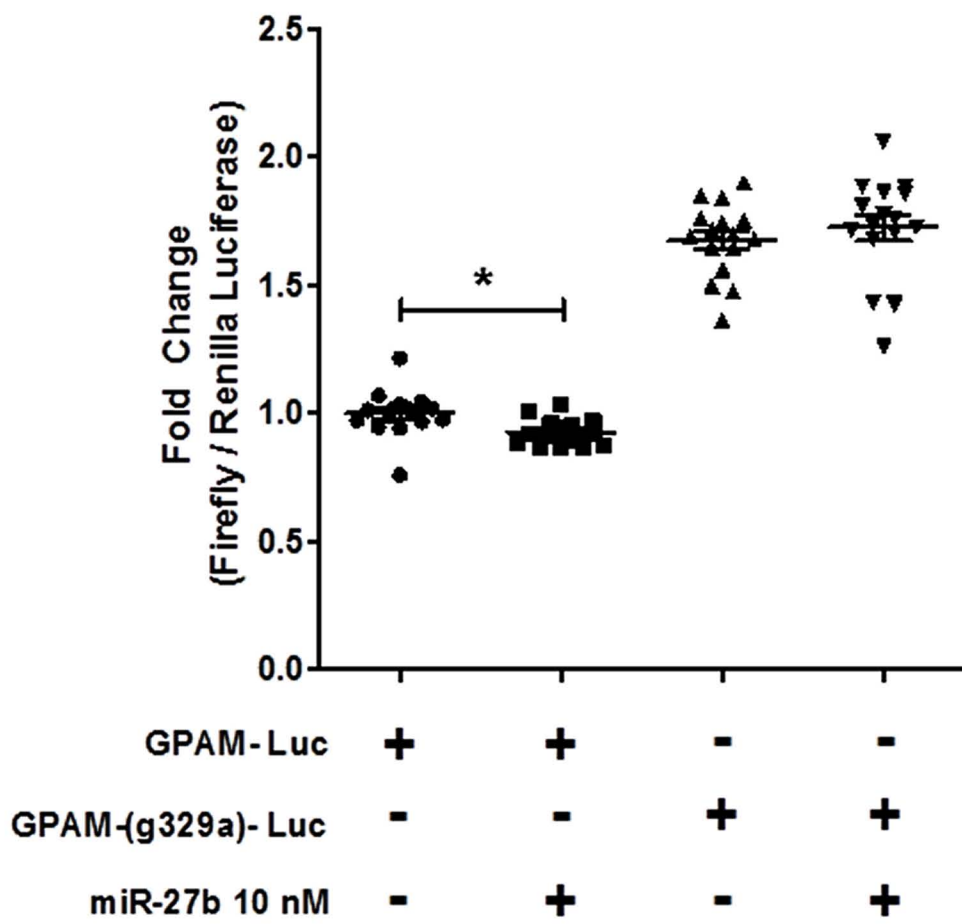

**Vickers Supplementary Figure 3**

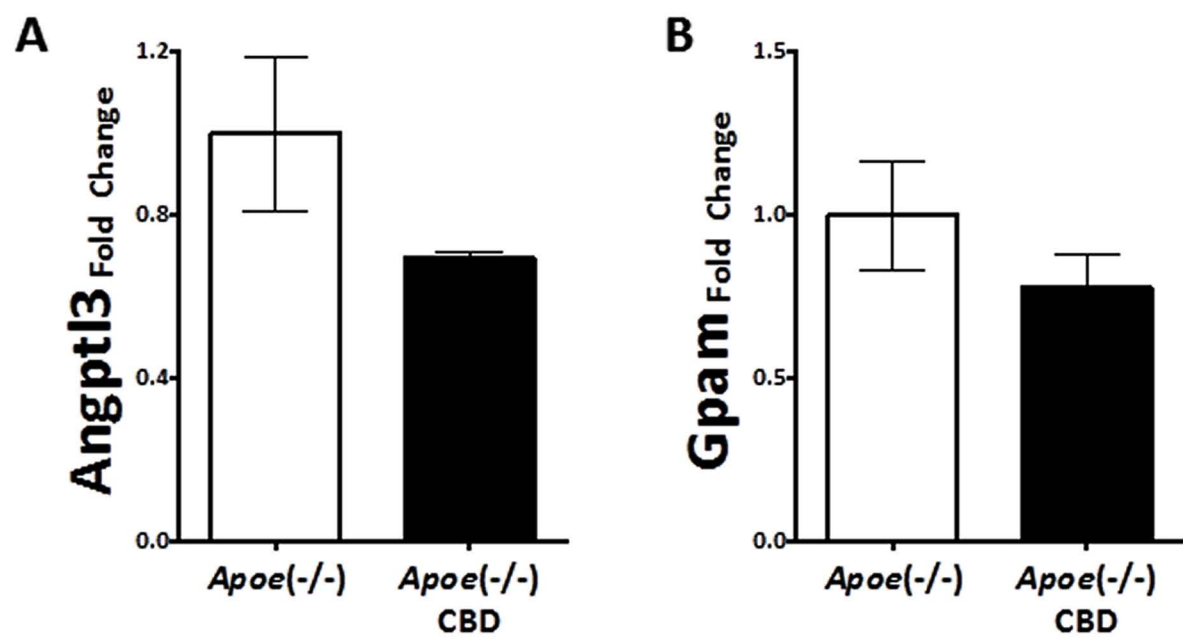

**Vickers Supplementary Figure 4**
